# Supplementary figures and images for: Synergy between Toxoplasma gondii type I ΔGRA17 immunotherapy and PD-L1 checkpoint inhibition triggers the regression of targeted and distal tumors
Source: HighWire-hosted journal article supplement (doi:10.1136/jitc-2021-002970), 2021-10-01

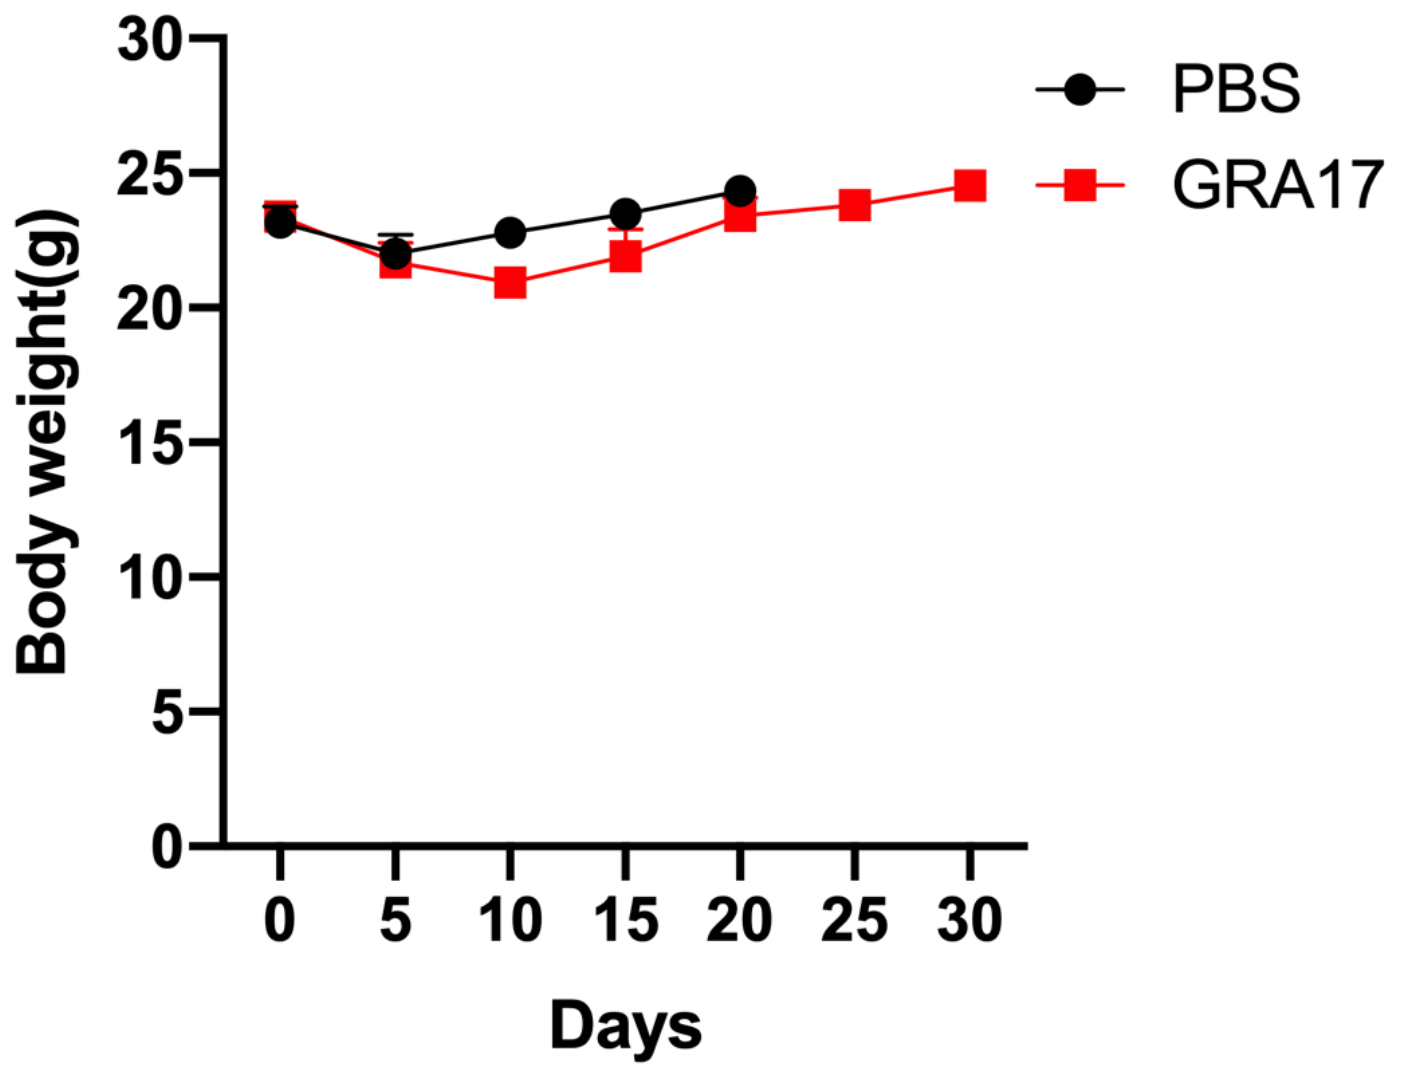

Supplement: jitc-2021-002970supp003_data_supplement.pdf [file jitc-2021-002970supp003_data_supplement.pdf]

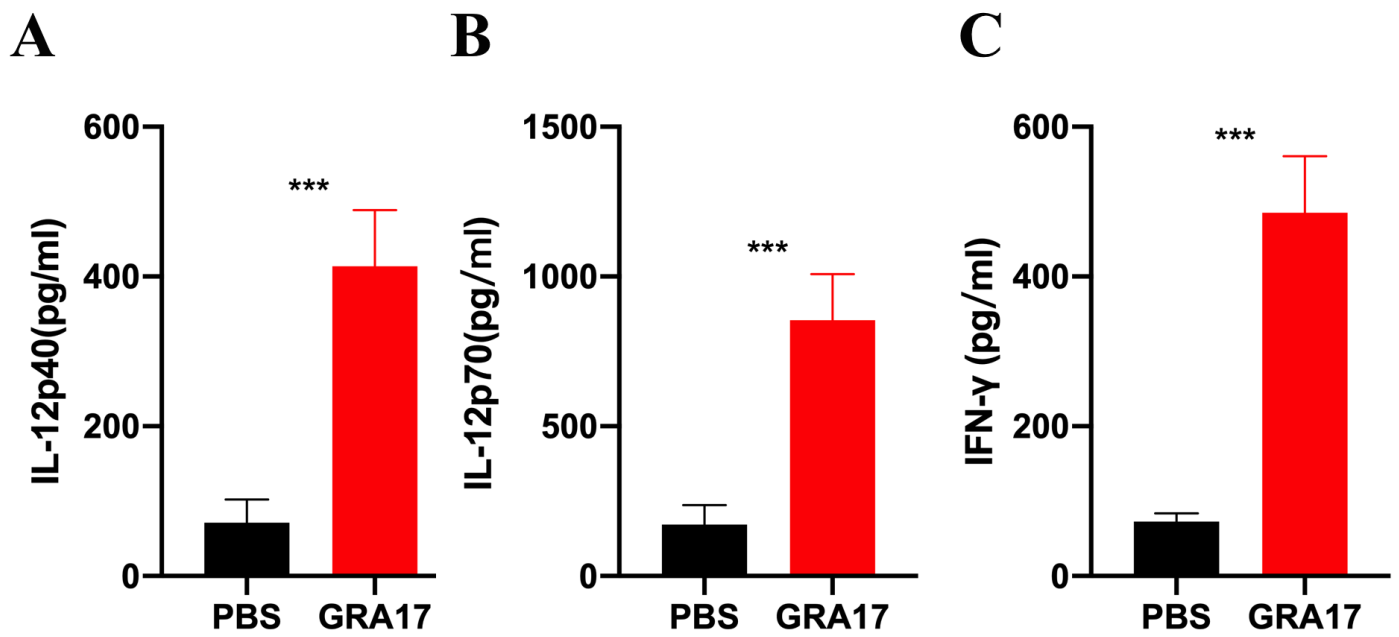

Supplement: jitc-2021-002970supp004_data_supplement.pdf [file jitc-2021-002970supp004_data_supplement.pdf]

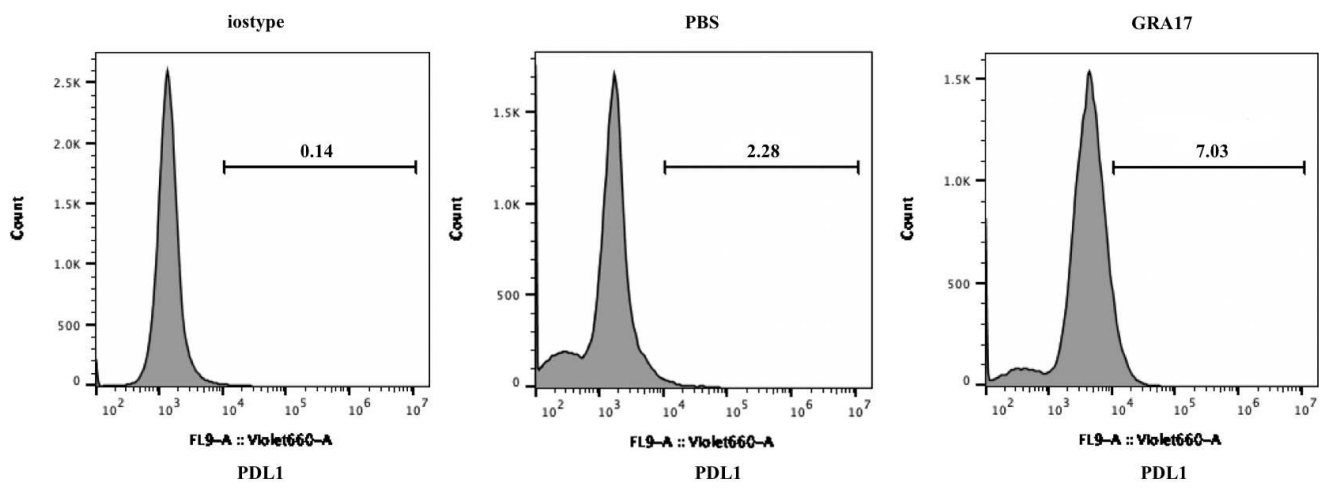

Supplement: jitc-2021-002970supp006_data_supplement.pdf [file jitc-2021-002970supp006_data_supplement.pdf]

(D) Inflammation

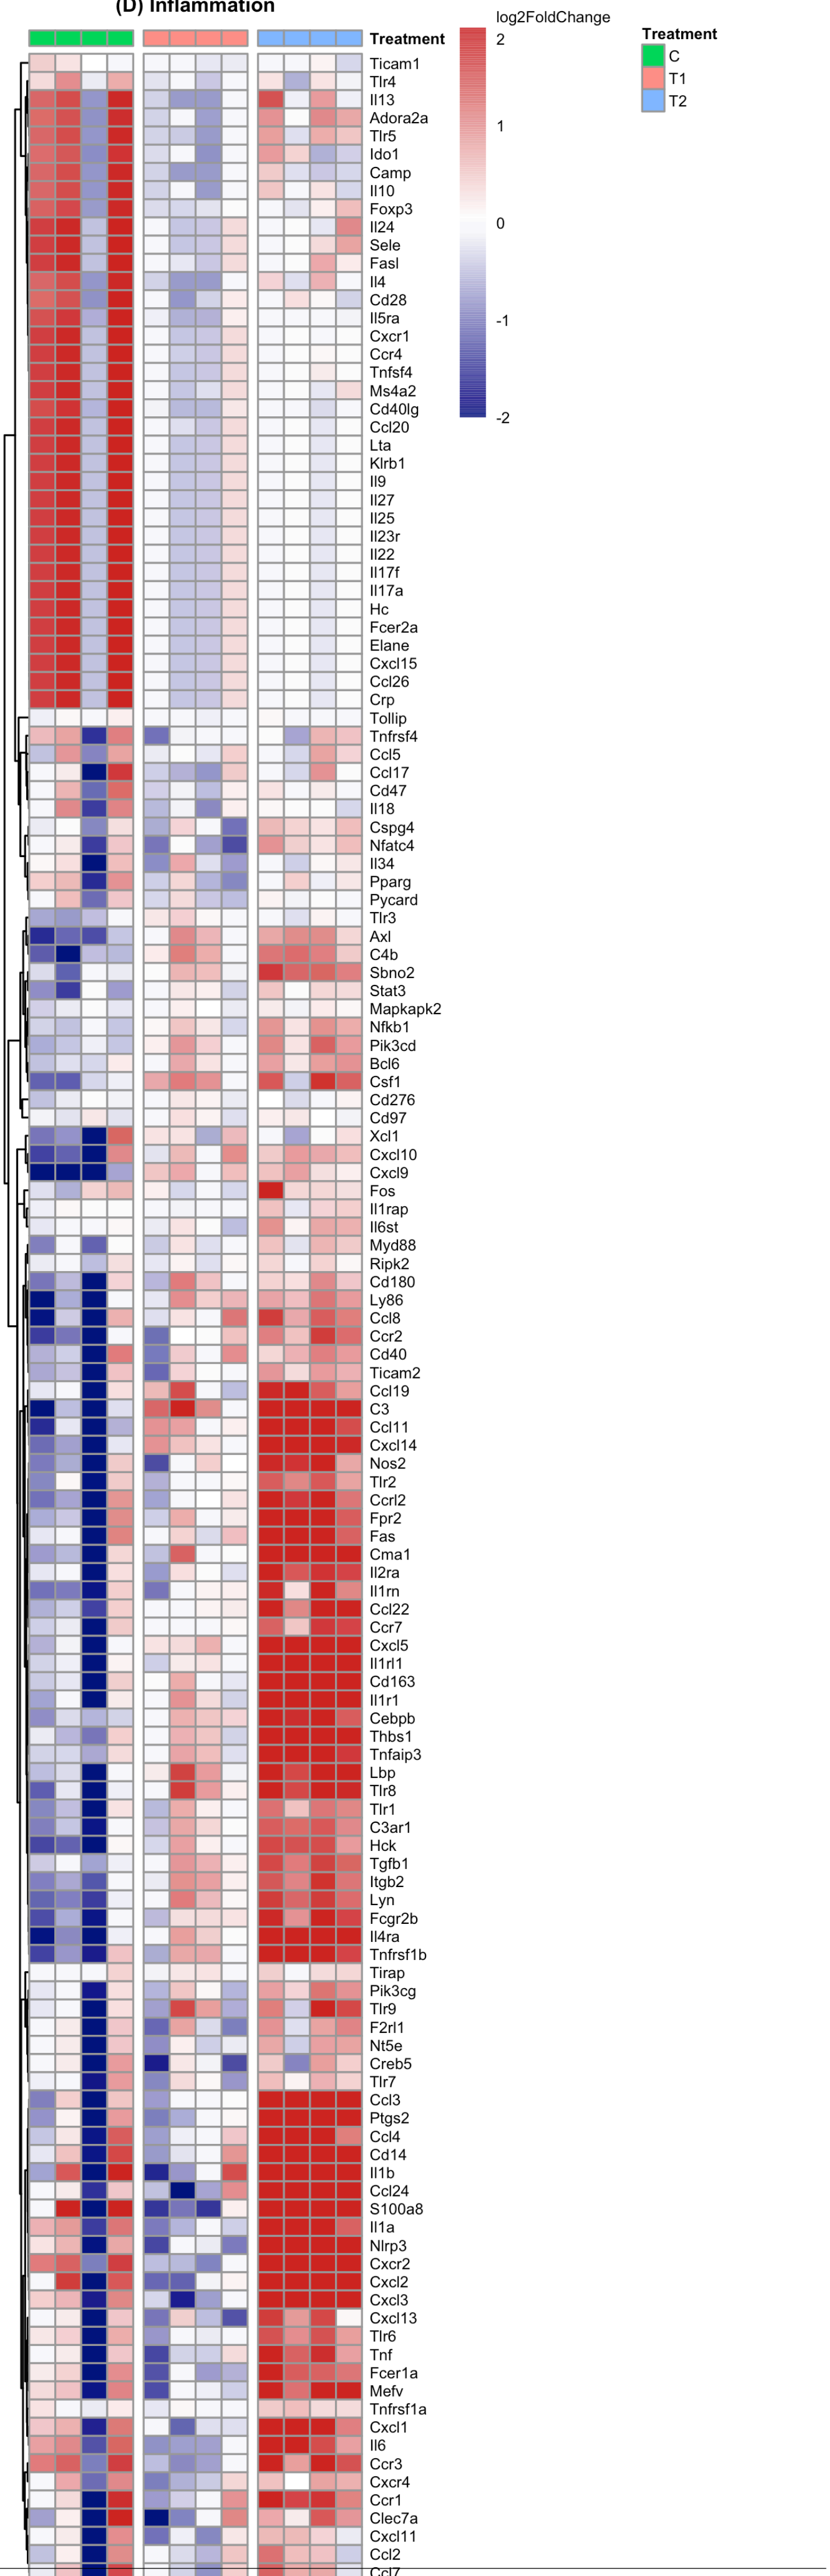

Supplement: jitc-2021-002970supp009_data_supplement.pdf [file jitc-2021-002970supp009_data_supplement.pdf]
